# Supplementary material for: Evaluating the Impact of Anthropogenic Factors on the Dissemination of Contemporary Cosmopolitan, Arctic, and Arctic-like Rabies Viruses
Source: MDPI journal article supplement (doi:10.3390/v14010066), 2021-12-30
Supplement: s1 [file s1]

**Table S1.** Selected closely related viruses found at distant locations.

| Genbank reference number and isolation location | Nearest Neighbor in Terms of Evolutionary Distance that was collected in a distant region | Approximate Direct Air Distance, km | Nt Sequence Identity between Strain of Interest and Its Nearest Neighbor, % | Branch velocity rate, km/year                   | Information about long-distance transfer |
|-------------------------------------------------|-------------------------------------------------------------------------------------------|-------------------------------------|-----------------------------------------------------------------------------|-------------------------------------------------|------------------------------------------|
| <b>Arctic-like</b>                              |                                                                                           |                                     |                                                                             |                                                 |                                          |
| FJ228546, USA, Alaska, 2007*                    | KF660246, India, Gujarat, 2012                                                            | 9740                                | 98                                                                          | 734                                             | [39]                                     |
| KY982922, China, Qinghai, 2014                  | KC171645, South Korea, 1999                                                               | 2778                                | 100.0                                                                       | 207                                             | this study                               |
| KX148226, Afghanistan, 2002*                    | EF611869, Iraq, 2005                                                                      | 2029                                | 99.9                                                                        | 889                                             | this study                               |
| KY860613, Russia, Primorsky Krai, 1989**        | EF611868, Russia, Zabaikalsky krai, 1980                                                  | 1693                                | 100.0                                                                       | 156                                             | this study                               |
| KU963488, USA, Alaska, 2007*                    | KX434489, India, Andhra Pradesh, 2002                                                     | 10146                               | 98.8                                                                        | 897                                             | this study                               |
| MG011654, France, 2016*                         | MG099711, Bangladesh, 2016                                                                | 7856                                | 100.0                                                                       | 6377                                            | Specified in GenBank annotation          |
| EU836832, Italy, 1996*                          | KX148228, Nepal, 1998                                                                     | 6522                                | 99.7                                                                        | 865                                             | [40]                                     |
| AY956319, Germany, 2005*                        | KY775603, India, Gujarat, 2014                                                            | 5933                                | 99.7                                                                        | 1882                                            | [41]                                     |
| KF154996, United Kingdom, 1987*                 | LT909541, Pakistan, 1984                                                                  | 6180                                | 99.0                                                                        | 654                                             | [42]                                     |
| MH258833, India, Goa, 2014*                     | MH258817, India, Chennai, 2014                                                            | 713                                 | 100.0                                                                       | 1536                                            | this study                               |
| <b>Cosmopolitan</b>                             |                                                                                           |                                     |                                                                             |                                                 |                                          |
| MF197741, Poland, 2008                          | KX533960, China, Inner Mongolia, 2015                                                     | 6609                                | 98.2                                                                        | N/A (several branches between these sequences ) | this study                               |
| MK598340, Hungary, 2007                         | LC422733, Mongolia, Selenge province, 2018                                                | 6018                                | 97.1                                                                        | N/A (several branches between these sequences)  | this study                               |
| KR781563, Brazil, Rondonia, 2007                | KU938904, Peru, 1999                                                                      | 1486                                | 99.8                                                                        | N/A (not Steppe subgroup)                       | this study                               |
| KY002894, Russia, Novosibirsk, 2002*            | KT965738, Kazakhstan, Almaty region, 2014                                                 | 1383                                | 99.8                                                                        | 839                                             | this study                               |
| KJ958263, Russia, Tuva, 2012 *,***              | KX533961, China, Inner Mongolia, 2015                                                     | 1790                                | 99.8                                                                        | 656                                             | this study                               |
| KP997032, Russia, Primorsky Krai, 2014*         | MF574191, Russia, N.Novgorod, 2013                                                        | 6048                                | 100.0                                                                       | 3621                                            | [7]                                      |

|                                                 |                                          |      |       |                                 |            |
|-------------------------------------------------|------------------------------------------|------|-------|---------------------------------|------------|
| KC737850, USA,<br>Massachusetts, 2011           | KR781569, Brazil,<br>Acre, 2007          | 5763 | 100.0 | N/A<br>(Not Steppe<br>subgroup) | [8]        |
| LC422737, Mongolia,<br>Selenge, 2018*           | LC422736, Mongolia,<br>Bulgan, 2018      | 1163 | 100.0 | 550                             | this study |
| LC422738, Mongolia,<br>Khuvsgul, 2018*          | LC422742, Mongolia,<br>Tuv, 2018         | 529  | 100.0 | 639                             | this study |
| AB571018, Mongolia,<br>Ulaanbaatar, 2005*       | AB571015, Mongolia,<br>Govi Altai, 2005  | 823  | 100.0 | 855                             | this study |
| KJ958241, Russia,<br>Krasnoyarsk, 2011*         | KJ958230, Russia,<br>Khakassia, 2011     | 271  | 99.69 | 560                             | this study |
| KY243236, Russia,<br>Zabaikalsky Krai,<br>2015* | KX533959, China,<br>Inner Mongolia, 2014 | 1253 | 99.59 | 1721                            | this study |

\* The velocity rate of the branch in the phylogeographic tree between this pair of samples was less than 500 km/year.

\*\* These 100% identical sequences were isolated in 1989 and 1980, respectively [43,44], and should be treated with caution regarding possible artefacts.

\*\*\* These viruses were isolated in neighboring regions, thus the evidence of long-distance transfer could be an artefact of approximate sampling coordinates.
