# Supplementary material for: Evaluating the Impact of Anthropogenic Factors on the Dissemination of Contemporary Cosmopolitan, Arctic, and Arctic-like Rabies Viruses
Source: MDPI journal article supplement (doi:10.3390/v14010066), 2021-12-30
Supplement: s1 [file s1]

```
makeblastdb -in ~/work/rabv_geo/NC_001542.fas -dbtype nucl -title NC_001542 -out  
~/soft/blast+/db/NC_001542; cd ~/soft/blast+/db ; blastn -max_hsps 5 -max_target_seqs 1 -word_size  
7 -query ~/work/rabv_geo/txid11292_260620_annotated_950+.fas -db NC_001542 -evalue  
0.0000000001 -out ~/work/rabv_geo/blastn_txid11292_260620_annotated_vs_NC_001542_tmp -  
outfmt '6 qseqid sseqid pident length qlen slen evalue qstart qend sstart send' ; cd ~/work/rabv_geo ;  
cut -f 1,10,11 blastn_txid11292_260620_annotated_vs_NC_001542_tmp > rabv_coord_in_NC_001542 ;  
cut -f 2,3 rabv_coord_in_NC_001542 > tmp; sed -i 's/\t/-/g' tmp ; perl -pe 's/(\d+)-  
(\d+)/join("",$1..$2)/eg' tmp > tmp1 ; sed -i ':a;N;$!ba;s/\n/,/g' tmp1 ; sed -i 's/,/\n/g' tmp1 ; sort -g  
tmp1 > tmp2; sed -i '/^$/d' tmp2; uniq -c tmp2 > tmp3 ; sed -i 's/^ */g' tmp3; awk '{print $2,$1}' tmp3  
> GB_occurrence_per_NC_001542_sites_950+.txt ;
```
