# Supplementary material for: Evaluating the Impact of Anthropogenic Factors on the Dissemination of Contemporary Cosmopolitan, Arctic, and Arctic-like Rabies Viruses
Source: MDPI journal article supplement (doi:10.3390/v14010066), 2021-12-30
Supplement: s1 [file s1]

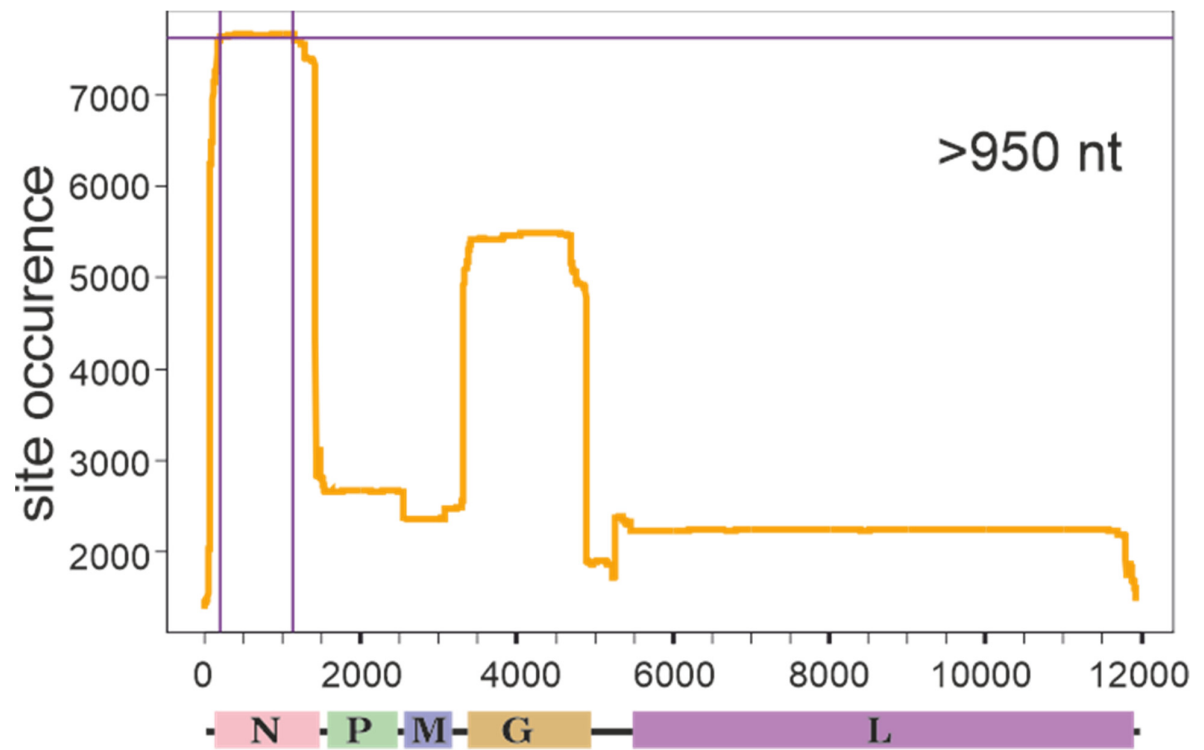

**Figure S1.** RABV genome layout and RABV genome fragments longer than 950 nucleotides represented in GenBank. Purple lines indicate the genome region used for this study.
